# Supplementary material for: A global assembly of adult female mosquito mark-release-recapture data to inform the control of mosquito-borne pathogens
Source: PubMed Central journal article supplement (PMC4067626; doi:10.1186/1756-3305-7-276), 2014-06-19
Supplement: 1756-3305-7-276-S1.pdf [file 1756-3305-7-276-S1.pdf]

## ADDITIONAL FILE 1

**Table.** List of data fields in the main database table (MMRRdata\_main.csv within Additional file 3). Time and distance tables (MMRRdata\_time.csv and MMRRdata\_distance.csv, within Additional file 3) use the same nomenclature. For the former, the fields “day” and “day2” refer to the number of days passed after first release (when “day2” is available, a period of time was clearly defined). For the latter, the fields “distance1” and “distance2” refer to the distance, in meters, between the release point and the location of the traps (when “distance2” is available, a distance range was clearly defined).

| Field name             | Field definition                                                                           |
|------------------------|--------------------------------------------------------------------------------------------|
| ENL_ID                 | Unique identifier linking to each original source                                          |
| MRR_ID                 | Unique identified for each MMRR record                                                     |
| date_st                | First day of experiment (date of first release)                                            |
| date_en                | Last day of experiment (last date of last recapture)                                       |
| species1, 2, 3         | Mosquito species studied (up to three species, 1 being the main one)                       |
| cohort                 | Cohort details, if defined                                                                 |
| mos_origin             | Origin of mosquitoes marked and released (see main text for definitions)                   |
| inoutrel               | Place of release (Indoors or Outdoors)                                                     |
| inoutrec               | Place of recapture (Indoors or Outdoors)                                                   |
| blood                  | Yes if female mosquitoes were blood-fed prior to release                                   |
| sugar                  | Yes if mosquitoes were sugar-fed prior to release                                          |
| age                    | Age at release, in days                                                                    |
| mark_meth1             | Main marking method used                                                                   |
| mark_meth2             | Alternative marking method used                                                            |
| release_meth           | Were mosquitoes released at a Single place or in Multiple places                           |
| capture_meth1          | Main capture method used                                                                   |
| capture_meth2          | Alternative capture method used                                                            |
| capture_meth3          | Alternative capture method used                                                            |
| releases_n             | Number of releases                                                                         |
| recaptures_n           | Number of recaptures                                                                       |
| time1                  | Time from first release to first recapture (days)                                          |
| time2                  | Time from first release to last recapture (days)                                           |
| trap_range             | Approximate radius of trapping area (m)                                                    |
| trap_range_shape       | Symmetry of trapping area: symmetric or asymmetric                                         |
| trap_number            | Number of traps or number of collecting locations                                          |
| release_sites_location | Location of release site(s): centric or eccentric                                          |
| n_released_f           | Number of marked female mosquitoes released                                                |
| n_captured_f           | Number of unmarked female mosquitoes captured                                              |
| n_recaptured_f         | Number of marked female mosquitoes recaptured                                              |
| rratef                 | Estimated recapture rate for females ( $n_{recaptured\_f}/n_{released\_f}$ )               |
| Pop1_f                 | Estimated female population size by Lincoln index                                          |
| Pop2_f                 | Estimated female population size by alternative method                                     |
| Pop3_f                 | Estimated female population size by alternative method                                     |
| Pop4_f                 | Estimated female population size by alternative method                                     |
| DPS1_f                 | Estimated daily probability of female survival by primary method                           |
| DPS2_f                 | Estimated daily probability of female survival by alternative method                       |
| MDT_f                  | Estimated mean distance travelled (females)                                                |
| MnDT_f                 | Estimated minimum distance travelled (females)                                             |
| MxDT_f                 | Estimated maximum distance travelled (females)                                             |
| GC                     | Estimated duration of the gonotrophic cycle in days                                        |
| disagg_d               | Yes if the record is disaggregated in time (days - linked to MMRRdata_time.txt via MRR_ID) |
