# Supplementary material for: A global assembly of adult female mosquito mark-release-recapture data to inform the control of mosquito-borne pathogens
Source: PubMed Central journal article supplement (PMC4067626; doi:10.1186/1756-3305-7-276), 2014-06-19
Supplement: 1756-3305-7-276-S2.pdf [file 1756-3305-7-276-S2.pdf]

## ADDITIONAL FILE 2

List of the 161 original sources for MMRR data. Numbers to the left of each reference correspond to the unique identifier field (ENL\_ID) in the main database table (MMRRdata\_main.csv file within Additional file 3).

- 7 Gu W, Muller G, Schlein Y, Novak RJ, Beier JC: **Natural plant sugar sources of Anopheles mosquitoes strongly impact malaria transmission potential.** *PLoS One* 2011, **6**:e15996.
- 8 Bellini R, Albieri A, Balestrino F, Carrieri M, Porretta D, Urbanelli S, Calvitti M, Moretti R, Maini S: **Dispersal and survival of Aedes albopictus (Diptera: Culicidae) males in Italian urban areas and significance for sterile insect technique application.** *J Med Entomol* 2010, **47**:1082-1091.
- 13 Marini F, Caputo B, Pombi M, Tarsitani G, della Torre A: **Study of Aedes albopictus dispersal in Rome, Italy, using sticky traps in mark-release-recapture experiments.** *Med Vet Entomol* 2010, **24**:361-368.
- 15 Baber I, Keita M, Sogoba N, Konate M, Diallo M, Doumbia S, Traore SF, Ribeiro JM, Manoukis NC: **Population size and migration of Anopheles gambiae in the Bancoumana Region of Mali and their significance for efficient vector control.** *PLoS One* 2010, **5**:e10270.
- 19 Lacroix R, Delatte H, Hue T, Reiter P: **Dispersal and survival of male and female Aedes albopictus (Diptera: Culicidae) on Reunion Island.** *J Med Entomol* 2009, **46**:1117-1124.
- 25 Maciel-de-Freitas R, Lourenco-de-Oliveira R: **Presumed unconstrained dispersal of Aedes aegypti in the city of Rio de Janeiro, Brazil.** *Rev Saude Publica* 2009, **43**:8-12.
- 26 Maciel-de-Freitas R, Eiras AE, Lourenco-de-Oliveira R: **Calculating the survival rate and estimated population density of gravid Aedes aegypti (Diptera, Culicidae) in Rio de Janeiro, Brazil.** *Cad Saude Publica* 2008, **24**:2747-2754.
- 28 Tsuda Y, Komagata O, Kasai S, Hayashi T, Nihei N, Saito K, Mizutani M, Kunida M, Yoshida M, Kobayashi M: **A mark-release-recapture study on dispersal and flight distance of Culex pipiens pallens in an urban area of Japan.** *J Am Mosq Control Assoc* 2008, **24**:339-343.
- 31 Lapointe DA: **Dispersal of Culex quinquefasciatus (Diptera: Culicidae) in a Hawaiian rain forest.** *J Med Entomol* 2008, **45**:600-609.
- 33 Harrington LC, Francoisevermeylen, Jones JJ, Kitthawee S, Sithiprasasna R, Edman JD, Scott TW: **Age-dependent survival of the dengue vector Aedes aegypti (Diptera: Culicidae) demonstrated by simultaneous release-recapture of different age cohorts.** *J Med Entomol* 2008, **45**:307-313.
- 39 Midega JT, Mbogo CM, Mwnambi H, Wilson MD, Ojwang G, Mwangangi JM, Nzovu JG, Githure JI, Yan G, Beier JC: **Estimating dispersal and survival of Anopheles gambiae and Anopheles funestus along the Kenyan coast by using mark-release-recapture methods.** *J Med Entomol* 2007, **44**:923-929.
- 40 Achee NL, Grieco JP, Andre RG, Rejmankova E, Roberts DR: **A mark release-recapture study to define the flight behaviors of Anopheles vestitipennis and Anopheles albimanus in Belize, Central America.** *J Am Mosq Control Assoc* 2007, **23**:276-282.

- 48 Maciel-de-Freitas R, Codeco CT, Lourenco-de-Oliveira R: **Daily survival rates and dispersal of *Aedes aegypti* females in Rio de Janeiro, Brazil.** *Am J Trop Med Hyg* 2007, **76**:659-665.
- 57 Elizondo-Quiroga A, Flores-Suarez A, Elizondo-Quiroga D, Ponce-Garcia G, Blitvich BJ, Contreras-Cordero JF, Gonzalez-Rojas JI, Mercado-Hernandez R, Beaty BJ, Fernandez-Salas I: **Gonotrophic cycle and survivorship of *Culex quinquefasciatus* (Diptera: Culicidae) using sticky ovitraps in Monterrey, northeastern Mexico.** *J Am Mosq Control Assoc* 2006, **22**:10-14.
- 59 Achee NL, Grieco JP, Andre RG, Rejmankova E, Roberts DR: **A mark-release-recapture study using a novel portable hut design to define the flight behavior of *Anopheles darlingi* in Belize, Central America.** *J Am Mosq Control Assoc* 2005, **21**:366-379.
- 61 Yamar BA, Diallo D, Kebe CM, Dia I, Diallo M: **Aspects of bioecology of two Rift Valley Fever Virus vectors in Senegal (West Africa): *Aedes vexans* and *Culex poicilipes* (Diptera: Culicidae).** *J Med Entomol* 2005, **42**:739-750.
- 62 Russell RC, Webb CE, Williams CR, Ritchie SA: **Mark-release-recapture study to measure dispersal of the mosquito *Aedes aegypti* in Cairns, Queensland, Australia.** *Med Vet Entomol* 2005, **19**:451-457.
- 64 Fabian MM, Toma T, Tsuzuki A, Saita S, Miyagi I: **Mark-release-recapture experiments with *Anopheles soperi* (Diptera: Culicidae) in the Yona Forest, northern Okinawa, Japan.** *Southeast Asian J Trop Med Public Health* 2005, **36**:54-63.
- 65 Harrington LC, Scott TW, Lerdthusnee K, Coleman RC, Costero A, Clark GG, Jones JJ, Kittthawee S, Kittayapong P, Sithiprasasna R, Edman JD: **Dispersal of the dengue vector *Aedes aegypti* within and between rural communities.** *Am J Trop Med Hyg* 2005, **72**:209-220.
- 67 dos Santos RL, Forattini OP, Burattini MN: ***Anopheles albitarsis* s.l. (Diptera: Culicidae) survivorship and density in a rice irrigation area of the state of Sao Paulo, Brazil.** *J Med Entomol* 2004, **41**:997-1000.
- 68 Watson TM, Saul A, Kay BH: ***Aedes notoscriptus* (Diptera: Culicidae) survival and dispersal estimated by mark-release-recapture in Brisbane, Queensland, Australia.** *J Med Entomol* 2000, **37**:380-384.
- 73 Reisen WK, Lothrop HD, Lothrop B: **Factors influencing the outcome of mark-release-recapture studies with *Culex tarsalis* (Diptera: Culicidae).** *J Med Entomol* 2003, **40**:820-829.
- 78 dos Santos RL, Forattini OP, Burattini MN: **Laboratory and field observations on duration of gonotrophic cycle of *Anopheles albitarsis* s.l. (Diptera: Culicidae) in southeastern Brazil.** *J Med Entomol* 2002, **39**:926-930.
- 80 Cho SH, Lee HW, Shin EH, Lee HI, Lee WG, Kim CH, Kim JT, Lee JS, Lee WJ, Jung GG, Kim TS: **A mark-release-recapture experiment with *Anopheles sinensis* in the northern part of Gyeonggi-do, Korea.** *Korean J Parasitol* 2002, **40**:139-148.
- 85 Harrington LC, Buonaccorsi JP, Edman JD, Costero A, Kittayapong P, Clark GG, Scott TW: **Analysis of survival of young and old *Aedes aegypti* (Diptera: Culicidac) from Puerto Rico and Thailand.** *J Med Entomol* 2001, **38**:537-547.
- 86 Tsuda Y, Takagi M, Wang S, Wang Z, Tang L: **Movement of *Aedes aegypti* (Diptera: Culicidae) released in a small isolated village on Hainan Island, China.** *J Med Entomol* 2001, **38**:93-98.
- 91 Tsuda Y, Takagi M, Suwonkerd W: **A mark-release-recapture study on the spatial distribution of host-seeking anophelines in northern Thailand.** *J Vector Ecol* 2000, **25**:16-22.

- 93 Tsuda Y, Takagi M, Toma T, Sugiyama A, Miyagi I: **Mark-release-recapture experiment with adult *Anopheles minimus* (Diptera: Culicidae) on Ishigaki Island, Ryukyu Archipelago, Japan.** *J Med Entomol* 1999, **36**:601-604.
- 94 Morrison AC, Costero A, Edman JD, Clark GG, Scott TW: **Increased fecundity of *Aedes aegypti* fed human blood before release in a mark-recapture study in Puerto Rico.** *J Am Mosq Control Assoc* 1999, **15**:98-104.
- 95 Muir LE, Kay BH: ***Aedes aegypti* survival and dispersal estimated by mark-release-recapture in northern Australia.** *Am J Trop Med Hyg* 1998, **58**:277-282.
- 96 Toure YT, Dolo G, Petrarca V, Traore SF, Bouare M, Dao A, Carnahan J, Taylor CE: **Mark-release-recapture experiments with *Anopheles gambiae* s.l. in Banambani Village, Mali, to determine population size and structure.** *Med Vet Entomol* 1998, **12**:74-83.
- 98 Quinones ML, Lines JD, Thomson MC, Jawara M, Morris J, Greenwood BM: ***Anopheles gambiae* gonotrophic cycle duration, biting and exiting behaviour unaffected by permethrin-impregnated bednets in The Gambia.** *Med Vet Entomol* 1997, **11**:71-78.
- 100 Costantini C, Li SG, Della Torre A, Sagnon N, Coluzzi M, Taylor CE: **Density, survival and dispersal of *Anopheles gambiae* complex mosquitoes in a west African Sudan savanna village.** *Med Vet Entomol* 1996, **10**:203-219.
- 102 Thomson MC, Connor SJ, Quinones ML, Jawara M, Todd J, Greenwood BM: **Movement of *Anopheles gambiae* s.l. malaria vectors between villages in The Gambia.** *Med Vet Entomol* 1995, **9**:413-419.
- 105 Mnzava AE, Rwegoshora RT, Wilkes TJ, Tanner M, Curtis CF: ***Anopheles arabiensis* and *An. gambiae* chromosomal inversion polymorphism, feeding and resting behaviour in relation to insecticide house-spraying in Tanzania.** *Med Vet Entomol* 1995, **9**:316-324.
- 107 Kramer VL, Carper ER, Beesley C, Reisen WK: **Mark-release-recapture studies with *Aedes dorsalis* (Diptera: Culicidae) in coastal northern California.** *J Med Entomol* 1995, **32**:375-380.
- 108 Trpis M, Hausermann W, Craig GB, Jr.: **Estimates of population size, dispersal, and longevity of domestic *Aedes aegypti aegypti* (Diptera: Culicidae) by mark-release-recapture in the village of Shauri Moyo in eastern Kenya.** *J Med Entomol* 1995, **32**:27-33.
- 109 Jensen T, Washino RK: **Comparison of recapture patterns of marked and released *Aedes vexans* and *Ae. melanimon* (Diptera: Culicidae) in the Sacramento Valley of California.** *J Med Entomol* 1994, **31**:607-610.
- 110 Fernandez-Salas I, Rodriguez MH, Roberts DR: **Gonotrophic cycle and survivorship of *Anopheles pseudopunctipennis* (Diptera: Culicidae) in the Tapachula foothills of southern Mexico.** *J Med Entomol* 1994, **31**:340-347.
- 115 Bryan JH, O'Donnell MS, Berry G, Carvan T: **Dispersal of adult female *Culex annulirostris* in Griffith, New South Wales, Australia: a further study.** *J Am Mosq Control Assoc* 1992, **8**:398-403.
- 117 Jaal Z, MacDonald WW: **A mark-release-recapture experiment with *Anopheles lesteri paraliae* in northwest Peninsular Malaysia.** *Ann Trop Med Parasitol* 1992, **86**:419-424.
- 119 O'Donnell MS, Berry G, Carvan T, Bryan JH: **Dispersal of adult females of *Culex annulirostris* in Griffith, New South Wales, Australia.** *J Am Mosq Control Assoc* 1992, **8**:159-165.
- 120 Rodriguez MH, Bown DN, Arredondo-Jimenez JI, Villarreal C, Loyola EG, Frederickson CE: **Gonotrophic cycle and survivorship of *Anopheles albimanus* (Diptera: Culicidae) in southern Mexico.** *J Med Entomol* 1992, **29**:395-399.

- 123 Chiang GL, Loong KP, Chan ST, Eng KL, Yap HH: **Capture-recapture studies with Anopheles maculatus Theobald (Diptera: Culicidae) the vector of malaria in peninsular Malaysia.** *Southeast Asian J Trop Med Public Health* 1991, **22**:643-647.
- 126 Reisen WK, Milby MM, Meyer RP, Pfuntner AR, Spoehel J, Hazelrigg JE, Webb JP, Jr.: **Mark-release-recapture studies with Culex mosquitoes (Diptera: Culicidae) in Southern California.** *J Med Entomol* 1991, **28**:357-371.
- 127 Jensen T, Washino RK: **An assessment of the biological capacity of a Sacramento Valley population of Aedes melanimon to vector arboviruses.** *Am J Trop Med Hyg* 1991, **44**:355-363.
- 128 Eldridge BF, Reeves WC: **Daily survivorship of adult Aedes communis in a high mountain environment in California.** *J Am Mosq Control Assoc* 1990, **6**:662-666.
- 133 Schreiber ET, Mulla MS, Chaney JD, Dhillon MS: **Dispersal of Culex quinquefasciatus from a dairy in southern California.** *J Am Mosq Control Assoc* 1988, **4**:300-304.
- 137 Trpis M, Hausermann W: **Dispersal and other population parameters of Aedes aegypti in an African village and their possible significance in epidemiology of vector-borne diseases.** *Am J Trop Med Hyg* 1986, **35**:1263-1279.
- 138 Hii JL: **Evidence for the existence of genetic variability in the tendency of Anopheles balabacensis to rest in houses and to bite man.** *Southeast Asian J Trop Med Public Health* 1985, **16**:173-182.
- 143 Rawlings P, Curtis CF: **Tests for the existence of genetic variability in the tendency of Anopheles culicifacies species B to rest in houses and to bite man.** *Bull World Health Organ* 1982, **60**:427-432.
- 144 Reisen WK, Mahmood F, Parveen T: **Anopheles culicifacies Giles: a release-recapture experiment with cohorts of known age with implications for malaria epidemiology and genetical control in Pakistan.** *Trans R Soc Trop Med Hyg* 1980, **74**:307-317.
- 146 Reisen WK, Aslam Y, Siddiqui TF, Khan AQ: **A mark-release-recapture experiment with Culex tritaeniorhynchus Giles.** *Trans R Soc Trop Med Hyg* 1978, **72**:167-177.
- 149 Macdonald WW, Sebastian A, Maung Tun M: **A mark-release-recapture experiment with Culex pipiens fatigans in the village of Okpo, Burma.** *Ann Trop Med Parasitol* 1968, **62**:200-209.
- 167 Tietze NS, Stephenson MF, Sidhom NT, Binding PL: **Mark-recapture of Culex erythrothorax in Santa Cruz County, California.** *J Am Mosq Control Assoc* 2003, **19**:134-138.
- 171 Walton WE, Workman PD, Tempelis CH: **Dispersal, survivorship, and host selection of Culex erythrothorax (Diptera: Culicidae) associated with a constructed wetland in southern California.** *J Med Entomol* 1999, **36**:30-40.
- 174 Pumpuni CB, Walker ED: **Population size and survivorship of adult Aedes triseriatus in a scrap tireyard in northern Indiana.** *J Am Mosq Control Assoc* 1989, **5**:166-172.
- 176 Charlwood JD, Bryan JH: **A mark-recapture experiment with the filariasis vector Anopheles punctulatus in Papua New Guinea.** *Ann Trop Med Parasitol* 1987, **81**:429-436.
- 953 Charlwood JD, Alecrim WA: **Capture-recapture studies with the South American malaria vector Anopheles darlingi, Root.** *Ann Trop Med Parasitol* 1989, **83**:569-576.
- 954 Birley MH, Charlwood JD: **The effect of moonlight and other factors on the oviposition cycle of malaria vectors in Madang, Papua New Guinea.** *Ann Trop Med Parasitol* 1989, **83**:415-422.

- 961 Charlwood JD, Graves PM: **The effect of permethrin-impregnated bednets on a population of *Anopheles farauti* in coastal Papua New Guinea.** *Med Vet Entomol* 1987, **1**:319-327.
- 1146 Ciota AT, Drummond CL, Drobneck J, Ruby MA, Kramer LD, Ebel GD: **Emergence of *Culex pipiens* from overwintering hibernacula.** *J Am Mosq Control Assoc* 2011, **27**:21-29.
- 1334 Ulloa A, Arredondo-Jimenez JI, Rodriguez MH, Fernandez-Salas I: **Mark-recapture studies of host selection by *Anopheles (Anopheles) vestitipennis*.** *J Am Mosq Control Assoc* 2002, **18**:32-35.
- 1336 McCall PJ, Mosha FW, Njunwa KJ, Sherlock K: **Evidence for memorized site-fidelity in *Anopheles arabiensis*.** *Trans R Soc Trop Med Hyg* 2001, **95**:587-590.
- 1365 Arredondo-Jimenez JI, Rodriguez MH, Washino RK: **Gonotrophic cycle and survivorship of *Anopheles vestitipennis* (Diptera: Culicidae) in two different ecological areas of southern Mexico.** *J Med Entomol* 1998, **35**:937-942.
- 1382 Hii JL, Birley MH, Sang VY: **Estimation of survival rate and oviposition interval of *Anopheles balabacensis* mosquitoes from mark-recapture experiments in Sabah, Malaysia.** *Med Vet Entomol* 1990, **4**:135-140.
- 1397 Bond JG, Rojas JC, Arredondo-Jimenez JI, Quiroz-Martinez H, Valle J, Williams T: **Population control of the malaria vector *Anopheles pseudopunctipennis* by habitat manipulation.** *Proc Biol Sci* 2004, **271**:2161-2169.
- 1429 Nelson RL, Milby MM, Grant CD: **Effects of fluorescent marker dusts on *Culex tarsalis*, a factor in mark-release-recapture studies.** In *Book Effects of fluorescent marker dusts on *Culex tarsalis*, a factor in mark-release-recapture studies* (Editor ed. eds.). pp. 66, 68. City; 1980:66, 68.
- 1484 Renshaw M, others: **Host finding, feeding patterns and evidence for a memorized home range of the mosquito *Aedes cantans*.** *Medical and Veterinary Entomology* 1994, **8**:187-193.
- 1490 Milby MM, Reisen WK: **Estimation of vectorial capacity: vector survivorship.** *Bull Soc Vector Ecol* 1989, **14**:47, 54.
- 1497 Fouque F, Carinci R, Gaborit P, Issaly J, Bicout DJ, Sabatier P: ***Aedes aegypti* survival and dengue transmission patterns in French Guiana.** *Journal of Vector Ecology* 2006, **31**:390, 399.
- 1511 Maciel-De-Freitas R, Codevito CT, LourenvO-De-Oliveira R: **Body size-associated survival and dispersal rates of *Aedes aegypti* in Rio de Janeiro.** *Medical and Veterinary Entomology* 2007, **21**:284-292.
- 1512 Reisen WK, Baker RH, Sakai RK, Mahmood F, Rathor HR, Raana K, Toqir G: ***Anopheles culicifacies* Giles: mating behavior and competitiveness in nature of chemosterilized males carrying a genetic sexing system.** *Annals of the Entomological Society of America* 1981, **74**:395, 401.
- 1513 Loong KP, Chiang GL, Eng KL, Chan ST, Yap HH: **Survival and feeding behaviour of Malaysian strain of *Anopheles maculatus* Theobald (Diptera: Culicidae) and their role in malaria transmission.** *Tropical Biomedicine* 1990, **7**:71-76.
- 1520 Nelson RL, Milby MM: **Dispersal and survival of field and laboratory strains of *Culex tarsalis* (Diptera: Culicidae).** *Journal of Medical Entomology* 1980, **17**:146-150.
- 1589 Reisen WK, Milby MM, Meyer RP: **Population dynamics of adult *Culex* mosquitoes (Diptera: Culicidae) along the Kern River, Kern County, California, in 1990.** *Journal of Medical Entomology* 1992, **29**:531-543.

- 1617 Maciel de Freitas R, Neto RB, Goncalves JM, Codeco CT, Lourenco-de-Oliveira R: **Movement of dengue vectors between the human modified environment and an urban forest in Rio de Janeiro.** *Journal of Medical Entomology* 2006, **43**:1112-1120.
- 1622 McDonald PT: **Population characteristics of domestic *Aedes aegypti* (Diptera: Culicidae) in villages on the Kenya Coast I. Adult survivorship and population size.** *Journal of Medical Entomology* 1977, **14**:42-48.
- 1623 Curtis CF, Rawlings P: **A preliminary study of dispersal and survival of *Anopheles culicifacies* in relation to the possibility of inhibiting the spread of insecticide resistance.** *Ecological Entomology* 1980, **5**:11-17.
- 1640 Burkot TR, Graves PM, Paru R, Battistutta D, Barnes A, Saul A: **Variations in malaria transmission rates are not related to anopheline survivorship per feeding cycle.** *The American Journal of Tropical Medicine and Hygiene* 1990, **43**:321.
- 1724 Rawlings P, Davidson G: **The dispersal and survival of *Anopheles Culicifacies* Giles (Diptera: Culicidae) in a Sri Lankan village under malathion spraying.** *Bulletin of entomological research* 1982, **72**:139-144.
- 1727 Conway GR, Trpis M, McClelland GAH: **Population parameters of the mosquito *Aedes aegypti* (L.) estimated by mark-release-recapture in a suburban habitat in Tanzania.** *Journal of Animal Ecology* 1974, **43**:289-304.
- 1737 Taylor C, Tourv© YT, Carnahan J, Norris DE, Dolo G, Traorv© SF, Edillo FE, Lanzaro GC: **Gene flow among populations of the malaria vector, *Anopheles gambiae*, in Mali, West Africa.** *Genetics* 2001, **157**:743-750.
- 1753 LaSalle MW, Dakin ME: **Dispersal of *Culex salinarius* in southwestern Louisiana.** *MOSQ NEWS* 1982, **42**:543-550.
- 1994 Reisen WK, Mahmood F, Parveen T: ***Anopheles subpictus* Grassi: observations on survivorship and population size using mark-release-recapture and dissection methods.** *Researches on Population Ecology* 1979, **21**:12-29.
- 2030 Sinsko MJ, Craig GB: **Dynamics of an isolated population of *Aedes triseriatus* (Diptera: Culicidae). I. Population size.** *Journal of Medical Entomology* 1979, **15**:89-98.
- 2047 Lothrop H, Lothrop B, Palmer M, Wheeler S, Gutierrez A, Goms D, Reisen WK: **Evaluation of pyrethrin and permethrin ground ultra-low volume applications for adult *Culex* control in rural and urban environments of the Coachella Valley of California.** *Journal of the American Mosquito Control Association* 2007, **23**:190-207.
- 2064 Weidhaas DE, Breeland SG, Lofgren CS, Dame DA, Kaiser R: **Release of chemosterilized males for the control of *Anopheles albimanus* in El Salvador: IV. Dynamics of the test population.** *The American Journal of Tropical Medicine and Hygiene* 1974, **23**:298.
- 2073 McDonald PT: **POPULATION CHARACTERISTICS OF DOMESTIC AEDES AEGYPTI (DIPTERA: GULICIDAE) IN VILLAGES ON THE KENYA COAST II. Dispersal within and between villages.** *Journal of Medical Entomology* 1977, **14**:49-53.
- 2110 Nutsathapana S, Sawasdiwongphorn P, Chitprarop U, Cullen JR, Gass RF, Green CA: **A mark-release-recapture demonstration of host-preference heterogeneity in *Anopheles minimus* Theobald (Diptera: Culicidae) in a Thai village.** *Bulletin of entomological research* 1986, **76**:313-320.
- 2135 Nelson RL, Milby MM, Reeves WC, Fine PEM: **Estimates of survival, population size, and emergence of *Culex tarsalis* at an isolated site.** *Annals of the Entomological Society of America* 1978, **71**:801-808.
- 2214 Reisen WK, Mahmood F, Azra K: ***Anopheles culicifacies* Giles: Adult ecological parameters measured in rural Punjab province, Pakistan using capture-mark-release-**

- recapture and dissection methods, with comparative observations on *An. stephensi* Liston and *An. subpictus* Grassi. *Researches on Population Ecology* 1981, **23**:39-60.
- 2268 Reisen WK, Lothrop HD: **Population ecology and dispersal of *Culex tarsalis* (Diptera: Culicidae) in the Coachella Valley of California.** *Journal of Medical Entomology* 1995, **32**:490-502.
- 2279 Reisen WK, Milby MM, Reeves WC, Meyer RP, Bock ME: **Population ecology of *Culex tarsalis* (Diptera: Culicidae) in a foothill environment of Kern County, California: temporal changes in female relative abundance, reproductive status, and survivorship.** *Annals of the Entomological Society of America* 1983, **76**:800-808.
- 2840 Charlwood JD, Vij R, Billingsley PF: **Dry season refugia of malaria-transmitting mosquitoes in a dry savannah zone of east Africa.** *The American Journal of Tropical Medicine and Hygiene* 2000, **62**:726.
- 3565 McClelland GAH, McKenna RJ, Jolly DJ, Cahill TA: **Results of preliminary mark-release-recapture trials with *Aedes nigromaculis*.** *Proc Calif Mosq Control Assoc* 1973, **41**:107-108.
- 3656 Rawlings P, Curtis CF, Wickramasinghe MB, Lines J: **The influence of age and season on dispersal and recapture of *Anopheles culicifacies* in Sri Lanka.** *Ecological Entomology* 1981, **6**:307-319.
- 3677 Sempala SDK: **The Ecology of *Aedes (Stegomyia) africanus* (Theobald) in a Tropical Forest in Uganda: Mark Release Recapture Studies on a Female Adult Population.** *Insect Science and Its Application* 1981, **1**:211-224.
- 3723 Reisen WK, Mahmood F: **Relative abundance, removal sampling, and mark-release-recapture estimates of population size of *Anopheles culicifacies* and *An. stephensi* at diurnal resting sites in rural Punjab province, Pakistan.** *Mosquito news* 1981, **41**:22.
- 3985 Milby MM, Reisen WK, Meyer RP: **Mark-release-recapture studies with *Culex* mosquitoes along the Kern River, 1990.** In *Book Mark-release-recapture studies with Culex mosquitoes along the Kern River, 1990* (Editor ed. ^eds.), vol. 59. pp. 58-61. City; 1991:58-61.
- 4794 Reisen WK, Mahmood F, Parveen T: **Seasonal trends in population size and survivorship of *Anopheles culicifacies*, *An. stephensi* and *An. subpictus* (Diptera: Culicidae) in rural Punjab Province, Pakistan.** *Journal of Medical Entomology* 1982, **19**:86-97.
- 4889 dos Santos RLC, Forattini OP: **Marcacao-soltura-recaptura para determinar o tamanho da populacao natural de *Anopheles albitarsis* Is (Diptera: Culicidae).** *Rev Saude Publica* 1999, **33**:309-313.
- 6056 Bogojevic MS, Hengl T, Merdic E: **Spatiotemporal monitoring of floodwater mosquito dispersal in Osijek, Croatia.** *Journal of the American Mosquito Control Association* 2007, **23**:99-108.
- 6075 Takagi M, Tsuda Y, Suzuki A, Wada Y: **Movement of individually marked *Aedes albopictus* females in Nagasaki, Japan.** *Trop Med* 1995, **37**:79-85.
- 6174 Buei K, Ito S, Nakamura H, Yoshida M: **Field studies on the gonotrophic cycle of *Culex tritaeniorhynchus*.** *Japanese Journal of Sanitary Zoology* 1980, **31**:57-62.
- 6297 Ameneshewa B, others: **Blood-feeding behaviour of *Anopheles arabiensis* Patton (Diptera: Culicidae) in central Ethiopia.** *Journal of African Zoology* 1997, **111**:235-245.
- 6670 Bryan JH, Foley DH, Geary M, Carver CTJ: ***Anopheles annulipes* Walker (Diptera: Culicidae) at Griffith, New South Wales. 3. Dispersal of two sibling species.** *Australian Journal of Entomology* 1991, **30**:119-121.

- 6825 Haramis LD, Foster WA: **Survival and population density of *Aedes triseriatus* (Diptera: Culicidae) in a woodlot in central Ohio, USA.** *Journal of Medical Entomology* 1983, **20**:391-398.
- 6841 Laporta GZ: **Ecology of *Culex quinquefasciatus* and *Culex nigripalpus* at the Parque Ecológico do Tietê, São Paulo, Brasil.** 2007.
- 6897 Eyles DE, Bishop LK: **An experiment on the range of dispersion of *Anopheles quadrimaculatus*.** *American journal of epidemiology* 1943, **37**:239-245.
- 6900 Ordonez-Gonzalez JG, Mercado-Hernandez R, Flores-Suarez AE, Fernandez-Salas I: **The use of sticky ovitraps to estimate dispersal of *Aedes aegypti* in Northeastern Mexico.** *Journal of the American Mosquito Control Association* 2001, **17**:93-97.
- 6956 Walker ED, Copeland RS, Paulson SL, Munstermann LE: **Adult survivorship, population density, and body size in sympatric populations of *Aedes triseriatus* and *Aedes hendersoni* (Diptera: Culicidae).** *Journal of Medical Entomology* 1987, **24**:485-493.
- 7000 Pant CP, Yasuno M: **Field studies on the gonotrophic cycle of *Aedes aegypti* in Bangkok, Thailand.** *Journal of Medical Entomology* 1973, **10**:219-223.
- 7088 Weathersbee AA, Meisch MV: **Dispersal of *Anopheles quadrimaculatus* (Diptera: Culicidae) in Arkansas ricelands.** *Environmental Entomology* 1990, **19**:961-965.
- 7165 Bonnet DD, Worcester DJ: **The dispersal of *Aedes albopictus* in the territory of Hawaii.** *The American Journal of Tropical Medicine and Hygiene* 1946, **1**:465.
- 7172 Charlwood JD, Graves PM, Marshall TF: **Evidence for a 'memorized' home range in *Anopheles farauti* females from Papua New Guinea.** *Medical and Veterinary Entomology* 1988, **2**:101-108.
- 7426 Lounibos LP, Couto L, others: **Prompt mating of released *Anopheles darlingi* in western Amazonian Brazil.** *Journal of the American Mosquito Control Association* 1998, **14**:210-213.
- 8798 Roberts DR, Alecrim WD, Tavares AM, McNeill KM: **Field observations on the gonotrophic cycle of *Anopheles darlingi* (Diptera: Culicidae).** *Journal of Medical Entomology* 1983, **20**:189-192.
- 10060 Reisen WK, Sakai RK, Baker RH, Azra K: **ANOPHELES CULICIFACIES: OBSERVATIONS ON POPULATION ECOLOGY AND REPRODUCTIVE BEHAVIOR.** *Mosquito News* 1982, **42**:93.
- 10428 Dow RP, Reeves WC, Bellamy RE: **Dispersal of female *Culex tarsalis* into a larvicided area.** *The American Journal of Tropical Medicine and Hygiene* 1965, **14**:656-670.
- 10436 Self LS, Tun MM, Mathis HL, Abdulcader MH, Sebastian A: **Studies on infiltration of marked *Culex pipiens fatigans* into sprayed areas in Rangoon, Burma.** *Bulletin of the World Health Organization* 1971, **45**:379.
- 10465 Nayar JK, Provost MW, Hansen CW: **QUANTITATIVE BIONOMICS OF CULEX NIGRIPALPUS (DIPTERA: CULICIDAE) POPULATIONS IN FLORIDA 2. Distribution, dispersal and survival patterns.** *Journal of Medical Entomology* 1980, **17**:40-50.
- 10478 Mahmood F, Reisen WK: **Duration of the gonotrophic cycles of *Anopheles culicifacies* Giles and *Anopheles stephensi* Liston, with observations on reproductive activity and survivorship during winter in Punjab Province, Pakistan.** *Mosq News* 1981, **41**:41-50.
- 10539 Carnevale P, Bosseno MF, Molinier M, Lancien J, Le Pont F, Zoulani A: **Etude du cycle gonotrophique d'*Anopheles gambiae* (Diptera, Culicidae) (Giles, 1902) en zone de forêt dégradée d'Afrique Centrale.** *Cahiers ORSTOM, Serie Entomologie medicale et Parasitologie* 1979, **17**:55-75.
- 10577 Correa RR, Lima FO, Coda D: **Observations on the Flight and Longevity in Nature of *Anopheles albitarsis domesticus*.** *Journal of the National Malaria Society* 1950, **9**:280-284.



- 10580 Dow RP: **The dispersal of *Culex nigripalpus* marked with high concentrations of radiophosphorus.** *Journal of Medical Entomology* 1971, **8**:353-363.
- 10593 Eyles DE, Sabrosky CW, Russell JC: **Long-range dispersal of *Anopheles quadrimaculatus*.** In *Book Long-range dispersal of *Anopheles quadrimaculatus** (Editor ed.^eds.), vol. 60. pp. 1265-1293. City: US Govt. Print. Office; 1945:1265-1293.
- 10596 Reisen WK, Yoshimura G, Reeves WC, Milby MM, Meyer RP: **The impact of aerial applications of ultra-low volume adulticides on *Culex tarsalis* populations (Diptera: Culicidae) in Kern County, California, USA, 1982.** *Journal of Medical Entomology* 1984, **21**:573-585.
- 10836 Charlwood JD, Graves PM, Birley MH: **Capture-recapture studies with mosquitoes of the group of *Anopheles punctulatus* Donitz (Diptera: Culicidae) from Papua New Guinea.** *Bull Entomol Res* 1986, **76**:211-227.
- 11149 Causey OR, Kumm HW: **Dispersion of forest mosquitoes in Brazil: Preliminary studies.** *The American Journal of Tropical Medicine and Hygiene* 1948, **1**:469.
- 11219 Gillies MT, Wilkes TJ: **A study of the age-composition of populations of *Anopheles gambiae* Giles and *A. funestus* Giles in North-Eastern Tanzania.** *Bulletin of Entomological Research* 1965, **56**:237-262.
- 11227 Hitchcock JG: **Age composition of a natural population of *Anopheles quadrimaculatus* Say (Diptera: Culicidae) in Maryland, USA.** *Journal of Medical Entomology* 1968, **5**:125-134.
- 11283 Russell PF, Knipe FW, Rao TR, Putnam P: **Some experiments on flight range of *Anopheles culicifacies*.** *Journal of Experimental Zoology* 1944, **97**:135-163.
- 11346 Gillies MT: **Marking and release experiments with a tropical mosquito by the use of radioisotopes.** In *Book Marking and release experiments with a tropical mosquito by the use of radioisotopes* (Editor ed.^eds.). pp. 267. City; 1962:267.
- 11385 Kumm HW: **Studies in the Dispersion of *Anopheles* mosquitoes.** *The American Journal of Tropical Medicine and Hygiene* 1929, **1**:67.
- 11388 Causey OR, Kumm HW, Laemmert Jr HW: **Dispersion of forest mosquitoes in Brazil: further studies.** *The American Journal of Tropical Medicine and Hygiene* 1950, **1**:301.
- 11457 Smith GE, Watson RB, Crowell RL: **Observations on the flight range of *Anopheles quadrimaculatus*, Say.** *American journal of epidemiology* 1941, **34**:102-113.
- 13179 Trpis M, Hausermann W: **Demonstration of differential domesticity of *Aedes aegypti* (L.)(Diptera, Culicidae) in Africa by mark-release-recapture.** *Bulletin of Entomological Research* 1975, **65**:199-208.
- 13213 Lutwama JJ, Mukwaya LG: **Mark-release-recapture studies on three anthropophilic populations of *Aedes (Stegomyia) simpsoni* complex (Diptera: Culicidae) in Uganda.** *Bulletin of Entomological Research* 1994, **84**:521-527.
- 13221 Wada Y, Kawai S, Oda T, Miyagi I, Suenaga O, Nishigaki J, Omori N, Takahashi K, Matsuo R, Itoh T, others: **Dispersal experiment of *Culex tritaeniorhynchus* in Nagasaki area (Preliminary report).** In *Book Dispersal experiment of *Culex tritaeniorhynchus* in Nagasaki area (Preliminary report)* (Editor ed.^eds.). City; 1969.
- 13309 Nelson RL, Milby MM: **Autogeny and blood-feeding by *Culex tarsalis* (Diptera: Culicidae) and the interval between oviposition and feeding.** *The Canadian Entomologist* 1982, **114**:515-521.
- 13404 Takken W, Charlwood JD, Billingsley PF, Gort G: **Dispersal and survival of *Anopheles funestus* and *A. gambiae* sl (Diptera: Culicidae) during the rainy season in southeast Tanzania.** *Bulletin of Entomological Research* 1998, **88**:561-566.

- 13708 Ejercito A, Urbino CM: **Flight range of gravid and newly emerged Anopheles.** *Bulletin of the World Health Organization* 1951, **3**:663.
- 13748 Lines JD, Lyimo EO, Curtis CF: **Mixing of indoor-and outdoor-resting adults of Anopheles gambiae Giles sl and A. funestus Giles (Diptera: Culicidae) in coastal Tanzania.** *Bull Entomol Res* 1986, **76**:171-178.
- 13764 Gillies MT: **Studies on the dispersion and survival of Anopheles gambiae Giles in East Africa, by means of marking and release experiments.** *Bulletin of Entomological Research* 1961, **52**:99-127.
- 14055 Abdel-Malek AA, Abdel-Aal MA: **Study of the Dispersion and Flight Range of Anopheles Sergenti Theo. in Siwa Oasis Using Radioactive Isotopes as Markers.** *Trans roy Soc trop Med Hyg* 1966, **35**:968-973.
- 14515 Valerio L, Facchinelli L, Ramsey JM, Scott TW: **Dispersal of Male Aedes aegypti in a Coastal Village in Southern Mexico.** *Am J Trop Med Hyg* 2012, **86**:665-676.
- 14518 Edman JD, Scott TW, Costero A, Morrison AC, Harrington LC, Clark GG: **Aedes aegypti (Diptera: Culicidae) movement influenced by availability of oviposition sites.** *J Med Entomol* 1998, **35**:578-583.
- 14519 Baker RH, Reisen WK, Sakai RK, Rathor HR, Raana K, Azra K, Niaz S: **Anopheles culicifacies: Mating behavior and competitiveness in nature of males carrying a complex chromosomal aberration.** *Annals of the Entomological Society of America* 1980, **73**:581-588.
- 14523 Geiger JC, Purdy WC, Tarbett RE: **Effective malaria control in a ricefield district with observations on experimental mosquito flights.** *Journal of the American Medical Association* 1919, **72**:844-847.
- 14530 Zetek J: **Behavior of Anopheles albimanus Wiede. and tarsimaculata Goeldi.** *Annals of the Entomological Society of America* 1915, **8**:221-271.
- 14531 Bailey SF, Eliason DA, Hoffmann BL: **Flight and dispersal of the mosquito Culex tarsalis Coquillett in the Sacramento Valley of California.** *HILGARDIA* 1965, **37**:73-113.
- 14554 Takagi M, Tsuda Y, Wada Y: **Movement and oviposition of released Aedes albopictus (Diptera: Culicidae) in Nagasaki, Japan.** *Jpn J Sanit Zool* 1995, **46**:131-138.
- 14561 Yasuno M, Rajagopalan PK, La Brecque GC: **Migration patterns of Culex fatigans around Delhi, India.** *Tropical Medicine* 1975, **17**:91-96.
- 14567 Eyles DE, Cox WW: **The measurement of a population of Anopheles quadrimaculatus Say.** *Journal of the National Malaria Society* 1943, **2**:71-83.
- 14570 Eddy GW, Roth AR, Plapp FW: **Studies on the flight habits of some marked insects.** *J Econ Entomol* 1962, **55**:603-607.
- 14571 Russell PF, Domingo S: **Flight range of the funestus-minimus subgroup of Anopheles in the Philippines.** *American Journal of Tropical Medicine* 1934, **14**:139-157.
- 14573 Reuben R, Yasuno M, Panicker KN, La Brecque GC: **The estimation of adult populations of Aedes aegypti at two localities in Delhi, India.** In *Book The estimation of adult populations of Aedes aegypti at two localities in Delhi, India* (Editor ed.^eds.). City: World Health Organization; 1972.
- 14574 Sharma VP: **Rate of insemination of female Culex pipiens fatigans Wied. moving from wells to the village.** In *Book Rate of insemination of female Culex pipiens fatigans Wied. moving from wells to the village* (Editor ed.^eds.). City: World Health Organization; 1975.
- 14595 Germain M, Herve JP, Geoffroy B: **Évaluation de la durée du cycle trophogonique d'Aedes africanus (Theobald), vecteur potentiel de fièvre jaune, dans une galerie forestière du sud de la République Centr-africaine.** *Cahiers ORSTOM, Serie Entomologie Medicale et Parasitologie* 1974, **12**:127-133.

14598 Hervy JP: **Experience de marquage-lâcher-recapture portant sur *Aedes aegypti* Linné, en zone de savane soudanienne ouest-africaine. I. Le cycle trophogonique.** *Cahiers ORSTOM, Serie Entomologie Medicale et Parasitologie* 1977, **15**:353-364.
